# Supplementary material
Source: publisher site journal article supplement (https://www.dovepress.com/article/335016)
Supplement: Supplementary file 1 [file get_supplementary_file.php]

S1

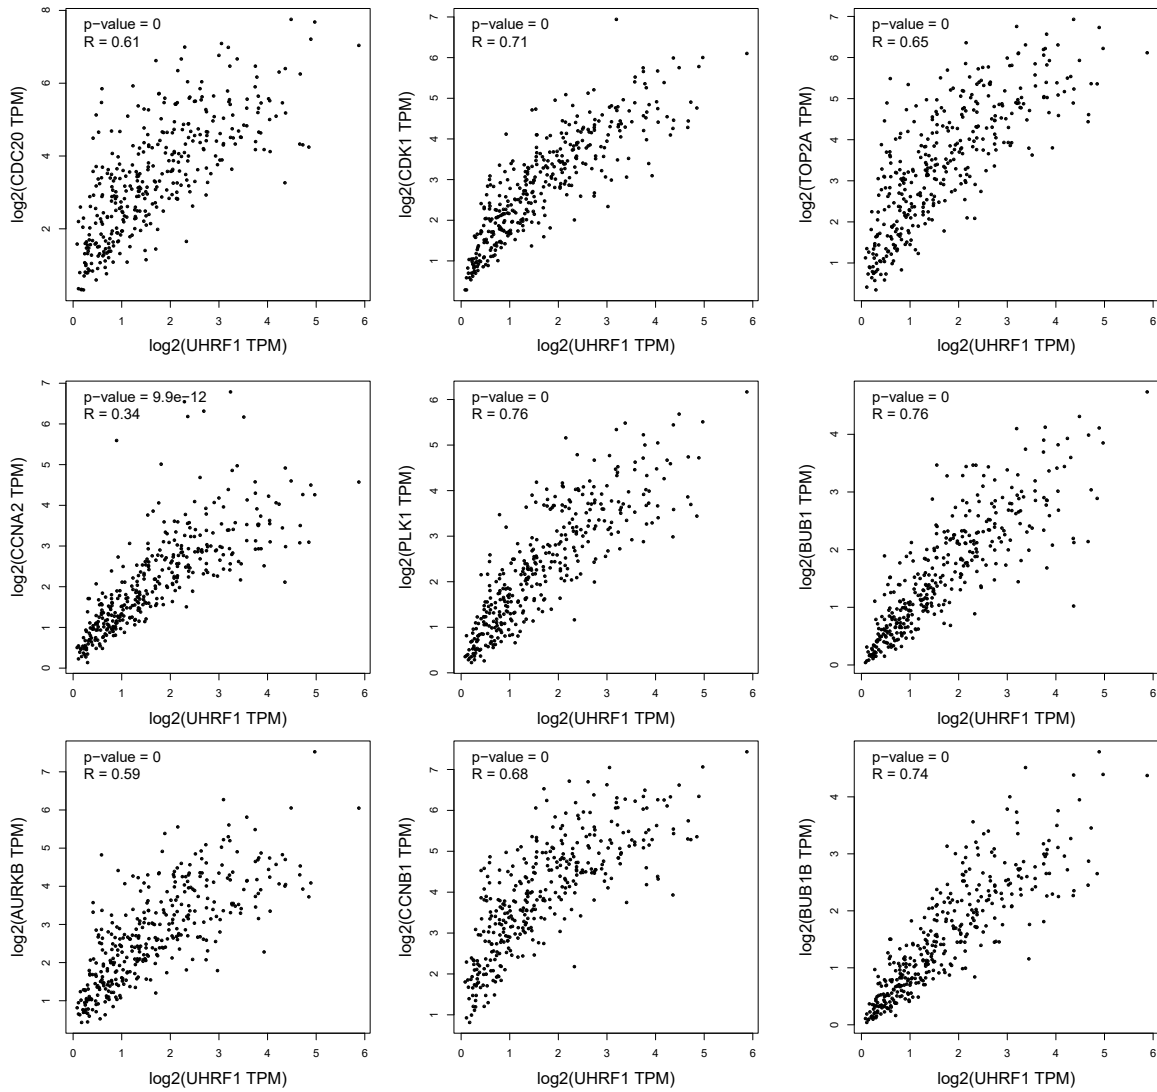

Figure S1. The relationship between UHRF1 expression and its relative genes (CDC20, CDK1, TOP2A, CCNA2, PLK1, BUB1, AURKB, CCNB1 and BUB1B) in HCC based on GEPIA database.

S2

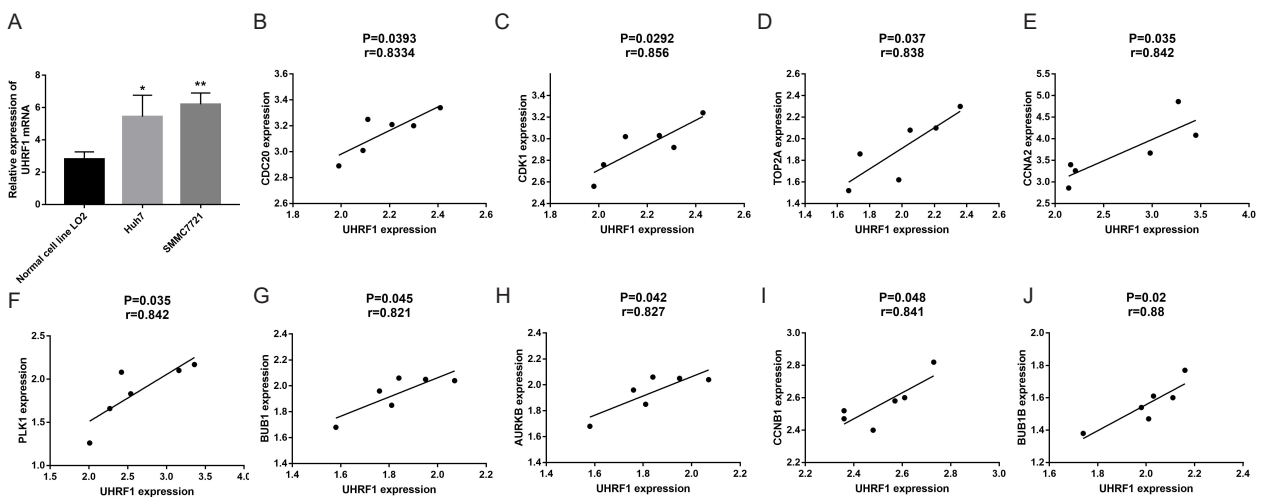

Figure S2. Expression of UHRF1 and its related genes in HCC cell lines.

A. UHRF1 was upregulated in HCC cells. B-J. Expression level of UHRF1 was positively correlated with CDC20, CDK1, TOP2A, CCNA2, PLK1, BUB1, AURKB, CCNB1 and BUB1B via RT-qPCR.
